# Supplementary material for: Overexpression of Malic Enzyme 2 Indicates Pathological and Clinical Significance in Oral Squamous Cell Carcinoma
Source: PubMed Central journal article supplement (PMC7085265; doi:10.7150/ijms.43832), 2020-03-05
Supplement: ijmsv17p0799s1.pdf [file ijmsv17p0799s1.pdf]

Supplementary Figure

Figure S1

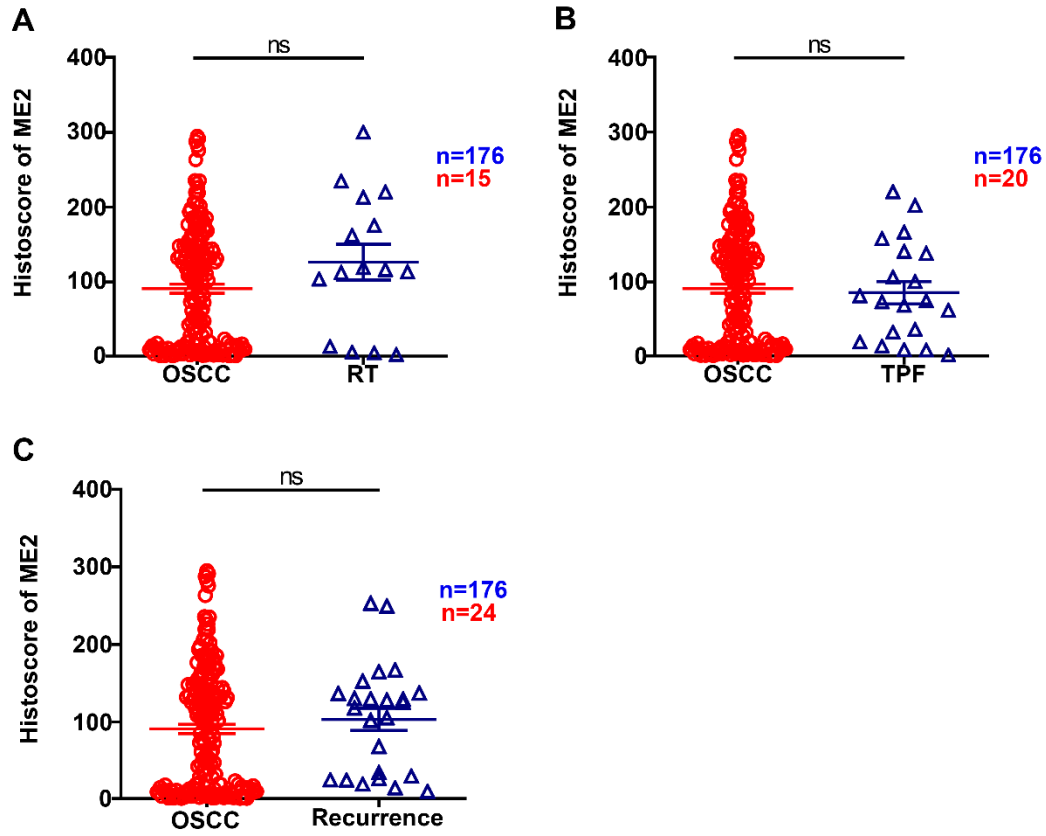

Fig. S1 Quantification of immunohistochemical histoscore of ME2 for primary oral squamous cell carcinoma tissue and tissue with preoperative TPF-inductive chemotherapy (A). Quantification of immunohistochemical histoscore of ME2 for primary oral squamous cell carcinoma tissue and tissue with preoperative TPF-inductive chemotherapy (B). Quantification of immunohistochemical histoscore of ME2 for primary oral squamous cell carcinoma tissue and recurring OSCC tissue (C).
